# Supplementary material for: Considerable Variability of Procedural Sedation and Analgesia Practices for Gastrointestinal Endoscopic Procedures in Europe
Source: PubMed Central journal article supplement — Clin Endosc. 2016 Jan 28;49(1):47–55. doi: 10.5946/ce.2016.49.1.47 (PMC4743717; doi:10.5946/ce.2016.49.1.47), 2016-01-28
Supplement: ce-49-1-47-Appendix.pdf [file ce-49-1-47-Appendix.pdf]

**Appendix 1. Online Survey, 5-Chapter, 21-Item Questionnaire**

1. What % of patients are served by uncontrolled sedation care (benzodiazepines with opioids) for diagnostic and therapeutic gastrointestinal (ERCP, colonoscopy, esophago-gastro-duodeno-scopy) procedures in your country?

- < 25 %
- 25 - 50 %
- 50 - 75 %
- > 75 %
- I do not know
- Other (please specify)

2. What % of patients are served by controlled sedation care (propofol with opioids) for diagnostic and therapeutic gastrointestinal (ERCP, colonoscopy, esophago-gastro-duodeno-scopy) procedures in your country?

- < 25 %
- 25 - 50 %
- 50 - 75 %
- > 75 %
- I do not know
- Other (please specify)

3. Which drugs do you use for sedation during diagnostic and therapeutic gastrointestinal procedures in your country? (more answers are possible)

- Midazolam
- Diazepam
- Meperidine
- Fentanyl
- Alfentanil
- Remifentanil
- Propofol
- Medication cocktails
- Others, (please specify)

4. The most popular drug(s) in your country for diagnostic and therapeutic gastrointestinal procedures is / are:

- Remifentanyl
- Midazolam
- Diazepam
- Meperidine
- Fentanyl
- Alfentanyl
- Propfol
- Medication Cocktails
- Others, (please specify)

5. Do you follow the sedation guidelines (for non-anesthesiologist administration of propofol for gastrointestinal procedures) during your daily practice?

- Yes
- No

6. If the answer to the above question is “No”, indicate why:

- I am not familiar with the guidelines
- We use other guidelines in our country
- Other reasons, (please specify)

7. Who is responsible for the administration of sedation during controlled sedation care (propofol) diagnostic and therapeutic gastrointestinal endoscopy procedures?

- Anesthesiologists (MD)
- Endoscopist (MD)
- Endoscopist nurse
- Endoscopy assistant (MD)
- Nurse anesthetist
- Sedation practitioner
- Other (please specify)

8. If you are using controlled sedation care in certain patients, how do you select them? (more answers are possible)

- Indication by procedure
- It is the patient preference
- It is the preference of the physician
- ASA classification 1 and 2
- ASA classification 1, 2, and 3
- ASA classification 1, 2, 3, and 4
- Previous procedure did not succeed
- Other (please specify)

9. Which patient’s parameters do you routinely monitoring during controlled sedation care (propofol)-based endoscopy sedation?

|                          | Yes | No |
|--------------------------|-----|----|
| Oxymetry                 |     |    |
| Heart rate               |     |    |
| Blood Pressure           |     |    |
| ECG                      |     |    |
| Capnography              |     |    |
| Others, (please specify) |     |    |

10. Which patient's parameters do you routinely monitor after controlled sedation care (propofol) based endoscopy sedation in the recovery room?
- Oximetry
  - Heart rate
  - Blood pressure
  - ECG
  - Capnography
  - Other (please specify)
11. Do all patients sign an informed consent form before undergoing an uncontrolled sedation care for diagnostic and therapeutic gastrointestinal endoscopy?
- Yes
  - No
12. Do all patients sign an inform consent before undergoing a controlled sedation care (propofol) for diagnostic and therapeutic gastrointestinal endoscopy?
- Yes
  - No
13. Do you use a 24 / 7 controlled sedation care (propofol) service?
- Yes
  - No
14. If the answer to the above question is " No, " the reason is:
15. Do you evaluate patient satisfaction, based on quality indicators?
- Yes
  - No
16. If the answer to the above questions is " Yes, " your quality indicators are:
17. Is there a complication registration for controlled sedation care (propofol) in a database?
- Yes
  - No
18. If the answer to the above question is " No, " the reasons is:
19. The responsible person who administers uncontrolled sedation care for digestive endoscopy is trained in: (more answers are possible)
- Basic life support (BLS)
  - Advanced cardiac life support (ACLS)
  - Basic airway management (e.g., jaw thrust, mask ventilation)
  - Treatment of acute respiratory problems
  - Pharmacology, interactions of sedatives and analgesics
  - Pre- intra- and post-endoscopy patient care concerning sedation
  - Different sedation concepts
  - Has followed a theoretical and practical sedation course with a certificate
20. The responsible person who administered controlled sedation care (propofol for digestive endoscopy is trained in: (more answers are possible)
- Basic life support (BLS)
  - Advanced cardiac life support (ACLS)
  - Basic airway management (e.g., jaw thrust, mask ventilation)
  - Treatment of acute respiratory problems
  - Pharmacology, interactions of sedatives and analgesics
  - Pre- intra- and post-endoscopy patient care concerning sedation
  - Different sedation concepts
  - Has followed a theoretical and practical sedation course with certificate
21. Which country are you working in? (please fill in your country below)
